# Supplementary material for: Germline mismatch repair (MMR) gene analyses from English NHS regional molecular genomics laboratories 1996–2020: development of a national resource of patient-level genomics laboratory records
Source: J Med Genet. 2022 Dec 26;60(7):669–78. doi: 10.1136/jmg-2022-108800 (PMC10359571; doi:10.1136/jmg-2022-108800)
Supplement: Supplementary data [file jmg-2022-108800supp003.xlsx]

## Sheet: Legends
	Supplementary Tables Supplementary Table 1. Summary of the key data items constituting the common data model for the NDRS germline MMR dataset. Data field completion is calculated as the percentage of data fields that are not empty in the NDRS germline MMR dataset (i.e. limited to patient-level records for MMR gene analyses.) Records are not collapsed to unique patients, therefore duplicate recor…

## Sheet: Sup Table 1.
Data field	Data Type	Description	Completeness (%)
PPATIENTS (pseudonymised patient identifiers)
PPATIENT_ID	Identifier	Primary key for PPATIENTS table	100
PSEUDO_ID1	Identifier	Unique encrypted pseudo ID for patient derived from NHS number. Linkable to national cancer registry.	See Supplementary Figure 3
PSEUDO_ID2	Identifier	Unique encrypted pseudo ID for patient derived from postcode and DoB. Linkable to national cancer registry	See Supplementary Figure 3
MOLECULAR_DATA (test information table)
MOLECULAR_DATAID	Identifier	Primary key for Test information table	100
PPATIENT_ID	Identifier	Foreign key for linking to Pseudo ID table	100
ORGANISATIONCODE_TESTRESULT	Categorical	Code for the testing laboratory	100
GENETICTESTSCOPE	Categorical	Full gene analysis / Targeted analysis	100
AUTHORISEDDATE	Date	Date test results reported	99.9837
PROVIDERCODE	Free text	Requesting hospital	98.2115
PRACTITIONERCODE	Free test	Requesting practitioner (coded)	97.5917
AGE	Numerical	Patient age at test episode	89.6548
SPECIMENTYPE*	Categorical	Type of specimen used for genetic test	74.6235
MOLECULARTESTINGTYPE*	Categorical	Diagnostic/Predictive/Carrier/Prenatal	76.9829
RECEIVEDDATE	Date	Date sample received	66.0506
REQUESTEDDATE	Date	Date test requested	42.1636
GENETIC_TEST_RESULTS
GENETIC_TEST_RESULT_ID	Identifier	Primary key for Genetic test result table	100
MOLECULAR DATA ID	Identifier	Foreign key for linking to Test information table	100
GENE	Categorical	Gene	99.9842
TESTSTATUS	Categorical	Normal/Abnormal/Failed/Unknown	99.9982
GENETICABERRATIONTYPE*	Categorical	Sequence/Epigenetic/Chromosomal variant	10.3278
GENETIC_SEQUENCE_VARIANTS
GENETIC_SEQUENCE_VARIANT_ID	Identifier	Primary key for Genetic sequence variant table	100
GENETIC_TEST_RESULT_ID	Identifier	Foreign key for linking to Genetic test result table	100
SEQUENCEVARIANTTYPE*	Categorical	Substitution/Insertion/Deletion/Indel/Duplication/Other	94.7894
CODINGDNASEQUENCECHANGE*	Free text	Sequence variant	77.1458
PROTEINIMPACT*	Free text	Protein variant	46.1572
VARIANTPATHCLASS*	Categorical	Variant pathogenicity classification (1-5)	29.8886
Supplementary Table 1. Summary of the key data items constituting the common data model for the NDRS germline MMR dataset. Data field completion is calculated as the percentage of data fields that are not empty in the NDRS germline MMR dataset (i.e. limited to patient-level records for MMR gene analyses.) Records are not collapsed to unique patients, therefore duplicate records are retained, and …

## Sheet: Sup Table 2.
source		fy_1996_97	fy_1997_98	fy_1998_99	fy_1999_00	fy_2000_01	fy_2001_02	fy_2002_03	fy_2003_04	fy_2004_05	fy_2005_06	fy_2006_07	fy_2007_08	fy_2008_09	fy_2009_10	fy_2010_11	fy_2011_12	fy_2012_13	fy_2013_14	fy_2014_15	fy_2015_16	fy_2016_17	fy_2017_18	fy_2018_19	fy_2019_20	fy_2020_21	Adjustment Factor	Total Apr 1996 - Mar 2020	NDRS Total tests/Adjusted consensus test total Apr 1996 - Mar 2020 (%)
West Midlands Regional Genetics Laboratory
	CMGS/ACGS total	54	54	54	14	51	179	419	297	327	354	280	395	983	1039	519	430	456	424	792	887
	NDRS Full gene analyses				#	35	102	117	73	119	123	79	150	102	98	113	102	140	173	155	165	134	161	228	301
	NDRS Targeted analyses				#4	16	8	41	38	102	120	97	107	114	148	139	132	130	143	199	228	199	227	258	281
	NDRS Total analyses				#4	51	110	158	111	221	243	176	257	216	246	252	234	270	316	354	393	333	388	486	582			5397
	Raw consensus analyses total	54	54	54	14	51	110	158	111	221	243	176	257	216	246	252	234	270	316	354	393	333	388	486	582	0		5573
	Adjusted consensus analyses total	24.8764	24.8764	24.8764	6.44944	51	110	158	111	221	243	176	257	216	246	252	234	270	316	354	393	333	388	486	582	0	2.17073	5478.08	0.985199
	Adjusted estimated full gene analyses	16.3862	16.3862	16.3862	4.24826	35	102	117	73	119	123	79	150	102	98	113	102	140	173	155	165	134	161	228	301	0		2723.41
	Adjusted estimated targeted analyses	8.49024	8.49024	8.49024	2.20117	16	8	41	38	102	120	97	107	114	148	139	132	130	143	199	228	199	227	258	281	0		2754.67
Leeds Genetics Laboratory
	CMGS/ACGS total	2	2	2	2	0	77	39	168	138	54	102	293	331	321	304	387	533	433	481	522
	NDRS Full gene analyses											#23	57	71	70	94	119	204	180	141	129	118	62	191	294	221
	NDRS Targeted analyses											#		4	8	19	45	109	101	122	150	208	177	195	261	81
	NDRS Total analyses											#23	57	75	78	113	164	313	281	263	279	326	239	386	555	302		3129
	Raw consensus analyses total	2	2	2	2	0	77	39	168	138	54	102	57	75	78	113	164	313	281	263	279	326	239	386	555	302		3715
	Adjusted consensus analyses total	0.900416	0.900416	0.900416	0.900416	0	34.666	17.5581	75.635	62.1287	24.3112	45.9212	57	75	78	113	164	313	281	263	279	326	239	386	555	302	2.2212	3392.82	0.922241
	Adjusted estimated full gene analyses	0.593107	0.593107	0.593107	0.593107	0	32.1449	13.0019	49.7419	33.4539	12.3057	20.6124	57	71	70	94	119	204	180	141	129	118	62	191	294	221		1893.63
	Adjusted estimated targeted analyses	0.307309	0.307309	0.307309	0.307309	0	2.52117	4.55622	25.893	28.6748	12.0055	25.3089	0	4	8	19	45	109	101	122	150	208	177	195	261	81		1499.19
Liverpool Genetics Laboratory
	CMGS/ACGS total									35		48	41	101	74	74	126	120	90	81	59
	NDRS Full gene analyses																#26	32	26	30	30	89	4
	NDRS Targeted analyses																#34	52	40	40	28	47	1
	NDRS Total analyses																#60	84	66	70	58	136	5					419
	Raw consensus analyses total	0	0	0	0	0	0	0	0	35	0	48	41	101	74	74	126	84	66	70	58	136	5	0	0	0		918
	Adjusted consensus analyses total	0	0	0	0	0	0	0	0	27.8	0	38.1257	32.5657	80.2229	58.7771	58.7771	100.08	84	66	70	58	136	5	0	0	0	1.25899	815.349	0.513891
	Adjusted estimated full gene analyses	0	0	0	0	0	0	0	0	14.9692	0	17.1132	23.5266	49.2154	31.2027	33.257	52.3445	32	26	30	30	89	4	0	0	0		432.629
	Adjusted estimated targeted analyses	0	0	0	0	0	0	0	0	12.8308	0	21.0125	9.03915	31.0075	27.5745	25.5201	47.7355	52	40	40	28	47	1	0	0	0		382.72
Manchester Genetics Laboratory
	CMGS/ACGS total	77	77	77	34	23	42	71	117	114	98	187	233	77	118	144	133	123	111	146	220
	NDRS Full gene analyses											#2	138	36	55	68	47	56	37	33	54	127	151	165	154	27
	NDRS Targeted analyses											#	32	38	51	50	45	45	62	64	87	115	130	129	78	28
	NDRS Total analyses											#2	170	74	106	118	92	101	99	97	141	242	281	294	232	55		2047
	Raw consensus analyses total	77	77	77	34	23	42	71	117	114	98	187	170	74	106	118	92	101	99	97	141	242	281	294	232	55		2964
	Adjusted consensus analyses total	58.8858	58.8858	58.8858	26.0015	17.5893	32.1195	54.2973	89.4759	87.1816	74.9456	143.008	170	74	106	118	92	101	99	97	141	242	281	294	232	55	1.30762	2748.28	0.74483
	Adjusted estimated full gene analyses	38.7883	38.7883	38.7883	17.1273	12.0711	29.7836	40.2075	58.8445	46.9439	37.9354	64.1913	138	36	55	68	47	56	37	33	54	127	151	165	154	27		1544.47
	Adjusted estimated targeted analyses	20.0976	20.0976	20.0976	8.87424	5.5182	2.33597	14.0898	30.6314	40.2377	37.0102	78.8171	32	38	51	50	45	45	62	64	87	115	130	129	78	28		1203.81
Newcastle Genetics Laboratory
	CMGS/ACGS total						42	66	298	169	209	128	71	281	555	101	144	46	40	165	203
	NDRS Full gene analyses											#5	35	64	35	13	15	8	2	12	13	16	48	46	81	51
	NDRS Targeted analyses											#	7	16	21	13	27	15	16	21	26	23	8	13	22	19
	NDRS Total analyses											#5	42	80	56	26	42	23	18	33	39	39	56	59	103	70		616
	Raw consensus analyses total	0	0	0	0	0	42	66	298	169	209	128	42	80	56	26	42	23	18	33	39	39	56	59	103	70		1528
	Adjusted consensus analyses total	0	0	0	0	0	9.38854	14.7534	66.6139	37.7777	46.7192	28.6127	42	80	56	26	42	23	18	33	39	39	56	59	103	70	4.47354	819.866	0.751343
	Adjusted estimated full gene analyses	0	0	0	0	0	8.70574	10.925	43.8092	20.3418	23.648	12.8432	35	64	35	13	15	8	2	12	13	16	48	46	81	51		508.273
	Adjusted estimated targeted analyses	0	0	0	0	0	0.682803	3.82842	22.8048	17.4359	23.0712	15.7695	7	16	21	13	27	15	16	21	26	23	8	13	22	19		311.593
Nottingham Genetics Laboratory
	CMGS/ACGS total														33	83	116	115	114	96	0
	NDRS Full gene analyses															#22	35	33	31	50	49	97	114	134	132	83
	NDRS Targeted analyses															#19	41	51	53	61	67	100	98	99	125	49
	NDRS Total analyses															#41	76	84	84	111	116	197	212	233	257	132		1370
	Raw consensus analyses total	0	0	0	0	0	0	0	0	0	0	0	0	0	33	83	76	84	84	111	116	197	212	233	257	132		1486
	Adjusted consensus analyses total	0	0	0	0	0	0	0	0	0	0	0	0	0	26.5646	66.8141	76	84	84	111	116	197	212	233	257	132	1.24225	1463.38	0.93619
	Adjusted estimated full gene analyses	0	0	0	0	0	0	0	0	0	0	0	0	0	14.1022	37.8044	35	33	31	50	49	97	114	134	132	83		726.907
	Adjusted estimated targeted analyses	0	0	0	0	0	0	0	0	0	0	0	0	0	12.4624	29.0096	41	51	53	61	67	100	98	99	125	49		736.472
Royal Marsden Genetics Laboratory
	CMGS/ACGS total																				19
	NDRS Full gene analyses																		#			22	50	40
	NDRS Targeted analyses																		#3	25	11	4	22	13
	NDRS Total analyses																		#3	25	11	26	72	53				187
	Raw consensus analyses total	0	0	0	0	0	0	0	0	0	0	0	0	0	0	0	0	0	0	25	11	26	72	53	0	0		187
	Adjusted consensus analyses total	0	0	0	0	0	0	0	0	0	0	0	0	0	0	0	0	0	0	25	11	26	72	53	0	0	1.72727	187	1
	Adjusted estimated full gene analyses	0	0	0	0	0	0	0	0	0	0	0	0	0	0	0	0	0	0	0	0	22	50	40	0	0		112
	Adjusted estimated targeted analyses	0	0	0	0	0	0	0	0	0	0	0	0	0	0	0	0	0	0	25	11	4	22	13	0	0		75
Wessex Regional Genetics Laboratory
	CMGS/ACGS total	16	16	16	88	117	163	142	178	214	224	168	300	274	364	212	143	161	203	144	161
	NDRS Full gene analyses																			#5	43	37	41	32	48	11
	NDRS Targeted analyses																			#12	75	51	60	70	87	13
	NDRS Total analyses																			#17	118	88	101	102	135	24		544
	Raw consensus analyses total	16	16	16	88	117	163	142	178	214	224	168	300	274	364	212	143	161	203	144	118	88	101	102	135	24		3687
	Adjusted consensus analyses total	11.7267	11.7267	11.7267	64.4969	85.7516	119.466	104.075	130.46	156.845	164.174	123.13	219.876	200.82	266.783	155.379	104.807	118	148.783	105.54	118	88	101	102	135	24	1.36441	2847.57	0.19104
	Adjusted estimated full gene analyses	7.72442	7.72442	7.72442	42.4843	58.8491	110.777	77.0679	85.7978	84.4548	83.1004	55.2688	158.846	123.2	141.625	87.9158	54.8171	63.7874	75.06	46.0708	43	37	41	32	48	11		1573.3
	Adjusted estimated targeted analyses	4.00229	4.00229	4.00229	22.0126	26.9024	8.68842	27.0067	44.6619	72.3899	81.0735	67.8617	61.0302	77.6203	125.157	67.4631	49.9904	54.2126	73.7226	59.4695	75	51	60	70	87	13		1274.27
Sheffield Diagnostic Genetics Service
	CMGS/ACGS total							4	10	175	165	159	123				27	55	75	91	173
	NDRS Full gene analyses																			26	28	41	34	49	30	#19
	NDRS Targeted analyses																		26	45	45	29	1	14	13	#6
	NDRS Total analyses																		26	71	73	70	35	63	43	#25		381
	Raw consensus analyses total	0	0	0	0	0	0	4	10	175	165	159	123	0	0	0	27	55	26	71	73	70	35	63	43	0		1099
	Adjusted consensus analyses total	0	0	0	0	0	0	2.18182	5.45455	95.4545	90	86.7273	67.0909	0	0	0	14.7273	30	26	71	73	70	35	63	43	0	1.83333	772.636	0.493117
	Adjusted estimated full gene analyses	0	0	0	0	0	0	1.61565	3.58722	51.3986	45.5556	38.9287	48.4687	0	0	0	7.70275	16.2171	0	26	28	41	34	49	30	0		421.474
	Adjusted estimated targeted analyses	0	0	0	0	0	0	0.566168	1.86732	44.0559	44.4444	47.7986	18.6222	0	0	0	7.02452	13.7829	26	45	45	29	1	14	13	0		351.162
Cambridge Genomics Laboratory
	CMGS/ACGS total				4			28	67	194	55	177	125	113	97	83	86	109	75	76	152
	NDRS Full gene analyses														#23	26	26	37	40	28	33	45	32	26	18	#2
	NDRS Targeted analyses														#											#
	NDRS Total analyses														#23	26	26	37	40	28	33	45	32	26	18	#2		311
	Estimated targeted analyses					0	0	0	0	0	0	0	0	0	0	19.9514	23.7107	31.4461	39.2873	36.1432	46.3033	51.2775	34.8391	23.2384	15.0058	0
	Raw consensus analyses total	0	0	0	4	0	0	28	67	194	55	177	125	113	97	26	26	37	40	28	33	45	32	26	18	0		1171
	Adjusted consensus analyses total	0	0	0	2.66328	0	0	18.643	44.61	129.169	36.6202	117.85	83.2276	75.2378	64.5846	45.9514	49.7107	68.4461	79.2873	64.1432	79.3033	96.2775	66.8391	49.2384	33.0058	0	1.50191	1204.81	0.258132
	Adjusted estimated full gene analyses	0	0	0	1.75431	0	0	13.8052	29.3381	69.5527	18.5361	52.8987	60.1264	46.1571	34.2857	26	26	37	40	28	33	45	32	26	18	0		637.454
	Adjusted estimated targeted analyses	0	0	0	0.908971	0	0	4.83774	15.2719	59.6166	18.084	64.9516	23.1012	29.0807	30.299	19.9514	23.7107	31.4461	39.2873	36.1432	46.3033	51.2775	34.8391	23.2384	15.0058	0		567.354
Great Ormond Street Genetics Laboratory
	CMGS/ACGS total
	NDRS Full gene analyses																							#58	62
	NDRS Targeted analyses																							#
	NDRS Total analyses																							#58	62			62
	Estimated targeted analyses					0	0	0	0	0	0	0	0	0	0	0	0	0	0	0	0	0	0	0	51.6865	0
	Raw consensus analyses total	0	0	0	0	0	0	0	0	0	0	0	0	0	0	0	0	0	0	0	0	0	0	0	62	0		62
	Adjusted consensus analyses total	0	0	0	0	0	0	0	0	0	0	0	0	0	0	0	0	0	0	0	0	0	0	0	113.687	0	1	113.687	0.545359
	Adjusted estimated full gene analyses	0	0	0	0	0	0	0	0	0	0	0	0	0	0	0	0	0	0	0	0	0	0	0	62	0		62
	Adjusted estimated targeted analyses	0	0	0	0	0	0	0	0	0	0	0	0	0	0	0	0	0	0	0	0	0	0	0	51.6865	0		51.6865
North West London Hospitals (KGC) Genetics Laboratory
	CMGS/ACGS total	18	18	18	14		88	80	100		292	497	180	522	230	208	138	172	183	549	116
	NDRS Full gene analyses																				#31	122	146	40
	NDRS Targeted analyses																				#
	NDRS Total analyses																				#31	122	146	40				308
	Estimated targeted analyses					0	0	0	0	0	0	0	0	0	0	0	0	0	0	0	0	139.019	158.953	35.7514	0	0
	Raw consensus analyses total	18	18	18	14	0	88	80	100	0	292	497	180	522	230	208	138	172	183	549	116	122	146	40	0	0		3731
	Adjusted consensus analyses total	13.9276	13.9276	13.9276	10.8326	0	68.0904	61.9003	77.3754	0	225.936	384.556	139.276	403.9	177.963	160.941	106.778	133.086	141.597	424.791	89.7555	261.019	304.953	75.7514	0	0	1.2924	3290.28	0.0936089
	Adjusted estimated full gene analyses	9.17414	9.17414	9.17414	7.13544	0	63.1384	45.8376	50.8865	0	114.363	172.613	100.617	247.786	94.4744	91.0628	55.8478	71.9423	71.4349	185.431	37.3494	122	146	40	0	0		1745.44
	Adjusted estimated targeted analyses	4.75344	4.75344	4.75344	3.69712	0	4.95203	16.0627	26.4889	0	111.573	211.943	38.6583	156.114	83.489	69.8781	50.9303	61.1434	70.1621	239.36	52.4061	139.019	158.953	35.7514	0	0		1544.84
Oxford Genetics Laboratory
	CMGS/ACGS total					25	38	41	127	65	83	93	105	93	88	90	114	105	117	290	236
	NDRS Full gene analyses																		#10	54	147	196	222	281	283	164
	NDRS Targeted analyses																		#
	NDRS Total analyses																		#10	54	147	196	222	281	283	164		1183
	Estimated targeted analyses					0	0	0	0	0	0	0	0	0	0	0	0	0	0	69.7047	206.26	223.342	241.696	251.154	235.924	79.2875
	Raw consensus analyses total	0	0	0	0	25	38	41	127	65	83	93	105	93	88	90	114	105	117	54	147	196	222	281	283	164		2367
	Adjusted consensus analyses total	0	0	0	0	22.6694	34.4575	37.1779	115.161	58.9405	75.2625	84.3303	95.2116	84.3303	79.7964	81.61	103.373	95.2116	106.093	123.705	353.26	419.342	463.696	532.154	518.924	243.288	1.10281	3484.71	0.339483
	Adjusted estimated full gene analyses	0	0	0	0	15.5575	31.9515	27.5305	75.7363	31.7372	38.0959	37.8528	68.7841	51.7352	42.3611	46.1762	54.0666	51.4687	53.5233	54	147	196	222	281	283	164		1809.58
	Adjusted estimated targeted analyses	0	0	0	0	7.11198	2.506	9.64742	39.4244	27.2033	37.1667	46.4775	26.4276	32.5951	37.4354	35.4338	49.306	43.7429	52.5697	69.7047	206.26	223.342	241.696	251.154	235.924	79.2875		1675.13
Full gene analyses:Targeted analyses ratio		1.93	1.93	1.93	1.93	2.1875	12.75	2.85366	1.92105	1.16667	1.025	0.814433	2.60274	1.58721	1.13158	1.30317	1.09655	1.17662	1.01814	0.774697	0.712692	0.877577	0.918508	1.11884	1.19954	2.06842
		fy_1996_97	fy_1997_98	fy_1998_99	fy_1999_00	fy_2000_01	fy_2001_02	fy_2002_03	fy_2003_04	fy_2004_05	fy_2005_06	fy_2006_07	fy_2007_08	fy_2008_09	fy_2009_10	fy_2010_11	fy_2011_12	fy_2012_13	fy_2013_14	fy_2014_15	fy_2015_16	fy_2016_17	fy_2017_18	fy_2018_19	fy_2019_20	fy_2020_21		Total Apr 1996 - Mar 2020	NDRS Total tests/Adjusted consensus test total Apr 1996 - Mar 2020 (%)
All Laboratories	NDRS Full gene analyses	0	0	0	0	35	102	117	73	119	123	79	380	273	258	314	344	510	489	529	691	1044	1065	1232	1403	557
	NDRS Targeted analyses	0	0	0	0	16	8	41	38	102	120	97	146	172	228	221	290	402	441	577	717	776	724	791	867	190
	NDRS Total analyses	0	0	0	0	51	110	158	111	221	243	176	526	445	486	535	634	912	930	1106	1408	1820	1789	2023	2270	747		15954
	Adjusted consensus analyses total	110.317	110.317	110.317	111.344	177.01	408.188	468.586	715.785	876.297	980.969	1228.26	1163.25	1289.51	1160.47	1078.47	1087.48	1319.74	1365.76	1742.18	1750.32	2233.64	2224.49	2333.14	2572.62	826.288		26618.5	0.599358
	Adjusted estimated full gene analyses	72.6661	72.6661	72.6661	73.3427	121.478	378.501	346.991	470.742	471.852	496.54	551.322	840.369	791.093	616.051	610.216	568.779	713.416	689.018	760.502	728.349	1044	1065	1232	1403	557		14190.6
	Adjusted estimated targeted analyses	37.6508	37.6508	37.6508	38.0014	55.5326	29.6864	121.595	245.044	404.445	484.429	676.94	322.879	498.418	544.418	468.256	518.698	606.328	676.742	981.677	1021.97	1189.64	1159.49	1101.14	1169.62	269.288		12427.9
	NDRS Total / Total Adjusted consensus	0	0	0	0	0.288119	0.269484	0.337184	0.155074	0.252198	0.247714	0.143292	0.452182	0.345092	0.418796	0.496072	0.583001	0.691043	0.68094	0.634837	0.804425	0.814814	0.80423	0.867071	0.88237
Supplementary Table 2. Estimation of total NHS germline MMR gene analyses captured in NDRS germline MMR dataset by laboratory and year. Raw consensus analyses total: the total number of NDRS analyses where complete data for that financial year is available, otherwise the total number of analyses in the CMGS/ACGS audit data. Adjusted consensus analyses total: the total number of NDRS analyses wher…

## Sheet: Sup Table 3.
			Timing of cancer diagnosis
Site	ICD10 Codes	GENETICTESTSCOPE	Before genetic test report date	After genetic test report date
Brain	C71	Full screen Colorectal Lynch or MMR	40	7
		Targeted Colorectal Lynch or MMR	5	6
Breast	C50	Full screen Colorectal Lynch or MMR	439	68
		Targeted Colorectal Lynch or MMR	102	60
Colorectal	C18-C20	Full screen Colorectal Lynch or MMR	4289	214
		Targeted Colorectal Lynch or MMR	309	164
Other	excluding C44	Full screen Colorectal Lynch or MMR	490	179
		Targeted Colorectal Lynch or MMR	122	93
Ovary	C56	Full screen Colorectal Lynch or MMR	445	13
		Targeted Colorectal Lynch or MMR	47	12
Prostate	C61	Full screen Colorectal Lynch or MMR	137	70
		Targeted Colorectal Lynch or MMR	40	23
Upper gastrointestinal	C15-C17, C22-C25	Full screen Colorectal Lynch or MMR	268	106
		Targeted Colorectal Lynch or MMR	19	44
Upper renal tract	C64-C66	Full screen Colorectal Lynch or MMR	128	36
		Targeted Colorectal Lynch or MMR	24	26
Uterus	C54-C55	Full screen Colorectal Lynch or MMR	1003	29
		Targeted Colorectal Lynch or MMR	115	47
Patients without a linked cancer		Full screen Colorectal Lynch or MMR	2260	/8282
		Targeted Colorectal Lynch or MMR	5250	/6196
Supplementary Table 3. Numbers of unique cancer registrations diagnosed between 1995-2019 inclusive linked to patients in the NDRS germline MMR dataset, separated by cancer site (ICD10), full gene or targeted analysis and timing of cancer diagnosis in relation to the MMR analysis report date (multiple primaries, multiple cancer sites, and cancers diagnosed before and after a genetic test in a sin…

## Sheet: Sup Table 4.
		Sex distribution (%)		Age distribution
Site	ICD10 Codes	Male	Female	Quartile 1	Median	Quartile 3
Colorectal	C18-C20	50.02	49.98	40	51	63
Uterus	C54-C55	0	100	46	54	62
Supplementary Table 4: Numbers of unique cancer registrations diagnosed between 1995-2019 inclusive linked to patients in the NDRS germline MMR dataset, separated by cancer site (ICD10). Only cancers in probands with MMR testing subsequent to cancer diagnosis (recipients of full gene analyses with an MMR analysis report date subsequent to a cancer diagnosis) are included. Multiple primaries and m…

## Sheet: Sup Table 5.
Test Status	Variant Pathogenicity Class	Cambridge Genomics Laboratory	Nottingham Genetics Laboratory	Oxford Genetics Laboratory	Royal Marsden Genetics Laboratory	Total	%
Abnormal	5 Pathogenic	95	114	77	22	308	0.137316
	4 Likely pathogenic	9	8	13	0	30	0.0133749
	3 Variant of uncertain significance	13	55	65	3	136	0.0606331
Normal	2 Likely benign	0	28	0	0	28	0.0124833
	1 Benign	0	21	0	0	21	0.00936246
	NA	218	446	969	87	1720	0.76683
Total number of unique patients receiving full gene MMR analyses							2243
Total number of unique patients with a pathogenic or likely pathogenic variant in a MMR gene identified							338
Pathogenic/likely pathogenic variant identification rate for full gene MMR analyses							0.150691
Proportion of abnormal test results which are pathogenic/likely pathogenic							0.71308
Supplementary Table 5: Variant pathogenicity class proportions for NHS germline MMR full gene analyses. Only laboratories with complete variant pathogenicity class for all abnormal variants including copy number variants are included.
